# Supplementary material for: Molecular identity crisis: environmental DNA metabarcoding meets traditional taxonomy—assessing biodiversity and freshwater mussel populations (Unionidae) in Alabama
Source: PeerJ journal article supplement (doi:10.7717/peerj.15127), 2023-04-03
Supplement: TableS1.pdf [file TableS1.pdf]

| Primer Pair Name                            | Target Species                                                                                                       | Gene Target | Amplicon Length (no Adapters) | Forward Primer                       | Reverse Primer                   | Multiplex (third) Primer (F- is forward R- is reverse) |
|---------------------------------------------|----------------------------------------------------------------------------------------------------------------------|-------------|-------------------------------|--------------------------------------|----------------------------------|--------------------------------------------------------|
| AllAmph12sRana_100+60                       | All Ranid frogs                                                                                                      | 12S         | 337                           | CAGTCTGTATACCTCCGTCGAAAGCT           | CCAGTACACTTACCATGTTACGACTTGC     | none                                                   |
| AllAmph12SSal_101+61                        | All salamanders                                                                                                      | 12S         | 406                           | CCVCCTAGAGGAGCCTGTCT                 | CCTCCGGTARRCTTACCATGTTACG        | none                                                   |
| AllTeleost12s_63+64                         | All teleost fish                                                                                                     | 12S         | 240                           | GTCAGGTCGAGGTGTAGCGC                 | CATGTTACGACTTGCCTCCCT            | none                                                   |
| AllChondrostei16S_116+117                   | All chondrostei fish                                                                                                 | 16S         | 335                           | ACGAGGGCTCAACTGTCTCT                 | CCTAGGGTAACTTGGTTCGTTGATCAG      | none                                                   |
| AllPhytophthCytB_92+93                      | <i>Phytophthora</i> sp.                                                                                              | COI         | 261                           | GCATTTGGTATTATTAGTCAAGTTTCWGCAGC     | AGGTGTTTCAAATTTAAWGAACCRCCC      | none                                                   |
| UnivFlies16S_194+195                        | Many Aquatic Insects                                                                                                 | 16S         | 347                           | CCGTGCAAAGGTAGCATAATCATTAGTCT        | AGAACTCTRAAAAAGATTACGCTGTTATCCC  | none                                                   |
| UnivCrayfish16S_78+191                      | All Crayfish                                                                                                         | 16S         | 302                           | GGCTAGAATGAATGGTTGGACAAGAAATAATCTG   | AGAACTCTYAAAAGAAATACGCTGTTATCCC  | none                                                   |
| SaprolegniaCOI_134+135                      | <i>Saprolegnia</i> sp.                                                                                               | COI         | 353                           | GGTACTTTATATATGATTTTTGGTGCTTTTTCAGGT | GGTGGATATACAGTCCAACCAGTACC       | none                                                   |
| BdChytridiITS_94+95                         | <i>Batrachochytrium dendrobatidis</i>                                                                                | ITS         | 176                           | GGATCTCTTGCTCTCGCAACG                | CATGGTTCATATCTGTCCAGTCAATTGG     | none                                                   |
| WhiteNoseCOI_174+175                        | <i>Pseudogymnoascus destructans</i>                                                                                  | COI         | 290                           | GGTATATGCGATGATGTCTATTGGAGTTTTAGG    | TGTCATGGAAGCGATATCAAGAGAAGC      | none                                                   |
| AllSalamanders2018-12S_198+199              | All salamanders                                                                                                      | 12S         | 399                           | AGCTTAAAYTCAAAGGACTTGRCGG            | GRCTTACCWTGTTACGACTTTCCTYTCT     | none                                                   |
| AllSEMussels_16S_200+201                    | All SE Mussels                                                                                                       | 16S         | 214                           | GHAGACGRAAAGACCCCGCG                 | GTCGCAAACCCAGCTTTCGAT            | none                                                   |
| OuniOjac_COI_Hickorynut 203+204             | <i>Obovaria unicolor</i> , <i>O. jacksoniana</i> and <i>Lampsilis ornata</i>                                         | COI         | 213                           | CTTATRATTGGGGCTCCTGATATGGCT          | AGCCAYACRAACAACGGAATCC           | none                                                   |
| Ouni_ND2_Hickorynut 205+206                 | <i>Obovaria unicolor</i>                                                                                             | ND2         | 203                           | TACCAGCTTCTCAAACCTACCTACCC           | AGAAATGGTTTGGGCTATGGCTCG         | none                                                   |
| Lorn_ND1_Pocketbook 209+210                 | <i>Lampsilis ornata</i>                                                                                              | ND1         | 290                           | TGAACGCAAAGCCCTCGGG                  | CTGTTATGAGGGTTGTGTAGACGGC        | none                                                   |
| Earc_COI_spike 211+212                      | <i>Elliptio arca</i> and <i>E. arctata</i>                                                                           | COI         | 210                           | TAATGTGATTGTGACGGCACATGC             | CCCAACGCCCTCCAC                  | none                                                   |
| Earc_ND1_spike 213+214                      | <i>Elliptio arca</i> and <i>E. arctata</i>                                                                           | ND1         | 142                           | CCATTGAGCCATAGCCCAAACC               | GCGGAGAGGGTCAAGGGTAGG            | none                                                   |
| Pdec_COI_SoClubshell 215+216                | <i>Pleurobema decisum</i>                                                                                            | COI         | 266                           | TTGTGCTGCTCTCTTTTTGTTATTGAGG         | CCGCTGTTACCGTCACAGCC             | none                                                   |
| PdecPper_ND1_Clubshell 217+218              | <i>Pleurobema decisum</i> and <i>P. perovatum</i>                                                                    | ND1         | 296                           | TGAACGCAAAGCTTTAGGGTACTTCC           | TCAACTGCTATTAAGTTGTGTAGACGG      | none                                                   |
| Pper_COI_OvateClub 219+220                  | <i>Plerobema</i> sp.                                                                                                 | COI         | 351                           | GCTTATTCCTTATGATTGGGGCTCC            | GCAKCAACCAACAAAACCGC             | none                                                   |
| Macu_ND1_moccasinshell 221+222              | <i>Medionidus acutissimus</i>                                                                                        | ND1         | 262                           | GAAITCCACAACCATTAGCAGACGC            | CCTAAGAGGGCATATTTAGAGTTTGAGGTTTC | none                                                   |
| Macu_COI_moccasinshell 223+224              | <i>Medionidus acutissimus</i>                                                                                        | COI         | 414                           | GGCAGCCTGGTAGTTGTTGG                 | GCTCAGCAATCAACACAGGATCG          | none                                                   |
| Hper_COI_mucket 225+226                     | <i>Hamiota perovalis</i>                                                                                             | COI         | 429                           | AACCCAGGAGACCGCATATTCC               | GAGTTTGTTAATTCGGGCTGAGCTG        | none                                                   |
| LrecSub_ND1_sandshellpondmussel 227+228     | <i>Ligumia recta</i> and <i>L. subrostrata</i>                                                                       | ND1         | 425                           | GTAAGAGGTGAGTAATACCAGCCCACT          | AATGGRGICYGATTTGTTTCTGC          | none                                                   |
| Lrec_COI_sandshell 229+230                  | <i>Ligumia recta</i>                                                                                                 | COI         | 290                           | TGACTTATCCCTTATGGTTGGAGC             | ACTAACCCAGGAGACCGTATATCCC        | none                                                   |
| QaspQver_ND1_OrbPistolgrip 231+232          | <i>Quadrula asperata</i> and <i>Q. verrucosa</i>                                                                     | ND1         | 254                           | GGRATYCCACAACCATTAGCAGACG            | GCGTATTTTGAGTTTGARGCTCAGCC       | none                                                   |
| Fcer_COI_Pigtoe 233+234                     | <i>Fusconaia cerina</i>                                                                                              | COI         | 314                           | GGTTTTGGTTACTTGTGCTGCTC              | CGGAATTCGCTCAGCAACCA             | none                                                   |
| Mner_ND1_Washboard 237+238                  | <i>Megaloniais nervosa</i>                                                                                           | ND1         | 244                           | GCCCTGGAACTACTTATTCTGTGC             | GGATGGATAGGGTGATGGTAGGTATGG      | none                                                   |
| Oref_ND1-Wartyback 239+240                  | <i>Oblivaria reflexa</i>                                                                                             | ND1         | 257                           | GGCCAAAATAAAGTAGGAATCATTGGC          | CATCCTGCTATGAGGGTTGTGTAGAC       | none                                                   |
| Cven_COI_BlacktailShiner 241+242            | <i>Cyprinella venusta</i>                                                                                            | COI         | 233                           | AGTCAACCTGGCTCACTTCTAGG              | TCAACACCAGAGGAAGCTAGTAGTAAGAG    | none                                                   |
| Cven_CytB_BlacktailShiner 243+244           | <i>Cyprinella venusta</i>                                                                                            | CytB        | 349                           | ATGCGAAGTATAGGACGGAGGC               | TGTTCTCCCTACCCTRCTTGG            | none                                                   |
| Anatlpun_CytB_Bullhead-Channel 253+254+255  | <i>Ameiurus natalis</i> and <i>Ictalurus punctatus</i>                                                               | CytB        | 233                           | AAAGAACTTGAACATCGGRGTGGTCC           | AATGGAAGTAGGAAGTGAATGCGAAGA      | R-AATGGCAGTAGGAAGTGAATGCG                              |
| Micropterus_CytB_Fwd 260+261                | <i>Micropterus salmoides</i> and <i>M. punctulatus</i>                                                               | CytB        | 352                           | GCAACCCCTTCTCATCCG                   | GGGTGAGGTTGGCATTGTC              | none                                                   |
| Munitus_Fwd_CytB 256+257                    | <i>Noturus munitus</i>                                                                                               | CytB        | 171                           | GGCTTCAACAATCCGACCG                  | GTTGGCGGAGTGAAGTTTTCC            | none                                                   |
| Munitus_Fwd_ND5 258+259                     | <i>Noturus munitus</i>                                                                                               | ND5         | 285                           | CCTTAAACAAAACCTGGGCCTTAAAGCA         | GGTACTTGAAGAATCGGTTTAGATGGGG     | none                                                   |
| Pnig_CytB_BlackbandedDarter 264+265         | <i>Percina nigrofasciata</i>                                                                                         | CytB        | 351                           | TCAGTGTGATGAACTTTGGCTCCT             | GGTYGACCCAGAAAGACATTTG           | none                                                   |
| Pbre_COI_CoalDarter 270+271                 | <i>Percina brevicauda</i>                                                                                            | COI         | 251                           | CCTGCCCTCTGTTCTCT                    | CAGCTCAAACGAATAAAGGGGCTG         | none                                                   |
| AllSculpins_CytB_CottusSp 273+274           | All N. Amererican Cottus                                                                                             | CytB        | 316                           | ACGGTGCTCTTYYTCTTCATTGTC             | GCAATTACGAAGGGGAADAGGAAGTGG      | none                                                   |
| LcyaLgulLmacLmeg_CytB_sunfish 245+246+247   | All lepomis/sunfish sp.                                                                                              | CytB        | 369                           | CCGCGCACMGTAAATCAC                   | TCGTTGTTTGGAGGTGGAGG             | F-GCCGCCACCGTAATTCACCTAC                               |
| Ecae_CytB_RainbowDarter 281+282             | <i>Etheostoma caeruleum</i>                                                                                          | CytB        | 324                           | CAGCTTCTCATCGGTTGCACAC               | AGAAGCCGCTCAAATCCACTG            | none                                                   |
| Pann_CytB_WhiteCrappie 285+286              | <i>Pomoxis annularis</i>                                                                                             | CytB        | 196                           | TGCCCTCAAACATCTCAGTCTG               | CCTCGCCAATGTGTARGTAGATGC         | none                                                   |
| Casp_ND2_CrystalDarter 287+288              | <i>Crystallaria asprella</i>                                                                                         | ND2         | 295                           | TTAGGACCCACAATTACCTTCGC              | GTGGACGGGGCAAGACC                | none                                                   |
| Mtem_CytB_AligatorSnapper 291+292           | <i>Macrochelys temminckii</i>                                                                                        | CytB        | 225                           | GCAATACACTATTACAGACATCTCAATAGC       | AGTGGCTATCGTTAGTAATAGGAGGATGAC   | none                                                   |
| Mtem_COI_AligatorSnapper 293+294            | <i>Macrochelys temminckii</i>                                                                                        | COI         | 297                           | TTCTACCCCATCTTACTACTACTTCTAGC        | CAAGTACAGGCAGTGAAAGTAATAATAGGACA | none                                                   |
| SETurtle3_ND4_GnigGgibGconTsele 301+302+303 | Many SE Turtle sp. Including: <i>G. nigrinoda</i> , <i>G. gibbonsi</i> , <i>P. cynocinna</i> , and <i>T. scripta</i> | ND4         | 394                           | ACCCAATGAGCATACACAGGYGC              | GAAGGTGTTCTCGTGTATGGGTTGG        | R-CCGTGTATGGGTGGGTGGT                                  |
| SETurtle3_CytB_GnigGgibGconTsele 304+305    | <i>Trachemys scripta elagans</i> , <i>Graptemys nigrinoda</i> , and <i>G. gobbonsi</i>                               | CytB        | 335                           | TGACGAGGACTTTATACGGCTC               | CTGTTGGGTTGTTGATCCAGTTTCATG      | none                                                   |
| Gnig_COI_BlackKnobbedMap 295+296            | <i>Graptemys nigrinoda</i>                                                                                           | COI         | 295                           | CGGGAAATGACTTGTGCCATAATAATTGG        | TATGGCTGGGGATTTATGTTAATTACTGTGG  | none                                                   |
| Pcon_CytB_RiverCooter 299+300               | <i>Pseudemys concinna</i>                                                                                            | CytB        | 334                           | TGACGAGGACTTACTACGGCTC               | TGTTGGGTTGTTGATCYGGTTTCATG       | none                                                   |
