# Supplementary material for: Molecular identity crisis: environmental DNA metabarcoding meets traditional taxonomy—assessing biodiversity and freshwater mussel populations (Unionidae) in Alabama
Source: PeerJ journal article supplement (doi:10.7717/peerj.15127), 2023-04-03
Supplement: TableS2.pdf [file TableS2.pdf]

| Amplicon Templates Used in Positive Control                                                     |             |              |
|-------------------------------------------------------------------------------------------------|-------------|--------------|
| Target Species                                                                                  | Target Gene | Primer Pair  |
| <b>METABARCODING TARGETS (Modified Positive)</b>                                                |             |              |
| ALL Ranid Frogs                                                                                 | 16s         | 100 + 60     |
| All Salamanders                                                                                 | 16s         | 101 + 61     |
| ALL Bony Fish                                                                                   | 16S         | 63 + 64      |
| All Chondrostei                                                                                 | 16S         | 116 + 117    |
| Phytophthora                                                                                    | CytB        | 92 + 93      |
| <i>Batrachochytrium dendrobatidis</i>                                                           | ITS         | 94 + 95      |
| ALL Crayfish                                                                                    | 16S         | 77 + 78      |
| Universal Mussel                                                                                | 16S         | 200+201      |
| <b>MUSSELS</b>                                                                                  |             |              |
| <i>Obovaria unicolor, Obovaria jacksoniana and Lampsilis ornata</i>                             | COI         | 203+204      |
| <i>Obovaria unicolor</i>                                                                        | ND2         | 205+206      |
| <i>Obovaria jacksoniana</i>                                                                     | ND2         | 207+208      |
| <i>Lampsilis ornata</i>                                                                         | ND2         | 209+210      |
| <i>Elliptio arca and Elliptio arctata</i>                                                       | COI         | 211+212      |
| <i>Elliptio arca and Elliptio arctata</i>                                                       | ND1         | 213+214      |
| <i>Pleurobema decisum</i>                                                                       | COI         | 215+216      |
| <i>Pleurobema decisum and P. perovatum</i>                                                      | ND1         | 217+218      |
| <i>Plerobema perovatum</i>                                                                      | COI         | 219+220      |
| <i>Medionidus acutissimus</i>                                                                   | ND1         | 221+222      |
| <i>Medionidus acutissimus</i>                                                                   | COI         | 223+224      |
| <i>Hamiota perovalis</i>                                                                        | COI         | 225+226      |
| <i>Ligumia recta and Ligumia subrostrata</i>                                                    | ND1         | 227+228      |
| <i>Ligumia recta</i>                                                                            | COI         | 229+230      |
| <i>Quadrula asperata and Quadrula verrucosa</i>                                                 | ND1         | 231+232      |
| <i>Fusconaia cerina</i>                                                                         | COI         | 233+234      |
| <i>Fusconaia cerina</i>                                                                         | ND1         | 235+236      |
| <i>Megalonaias nervosa</i>                                                                      | ND1         | 237+238      |
| <i>Obliquaria reflexa</i>                                                                       | ND1         | 239+240      |
| <b>FISH</b>                                                                                     |             |              |
| <i>Cyprinella venusta</i>                                                                       | COI         | 241+242      |
| <i>Cyprinella venusta</i>                                                                       | CytB        | 243+244      |
| <i>Lepomis cyanellus, Lepomis gulosus, Lepomis macrochirus</i>                                  | COI         | 245+246+ 247 |
| <i>Ameiurus natalis and Ictalurus punctatus</i> (all three primers run together)                | CytB        | 253+254+255  |
| <i>Noturus munitus</i>                                                                          | CytB        | 256+257      |
| <i>Noturus munitus</i>                                                                          | ND5         | 258+259      |
| <i>Micropterus salmoides and M. punctulatus</i>                                                 | CytB        | 260+261      |
| <i>Micropterus salmoides and M. punctulatus</i>                                                 | COI         | 262+263      |
| <i>Percina nigrofasciata</i>                                                                    | CytB        | 264+265      |
| <i>Percina breviceauda</i>                                                                      | ND2         | 268+269      |
| <i>Percina breviceauda</i>                                                                      | COI         | 270+271      |
| <i>Cottus carolinae</i>                                                                         | CytB        | 273+274      |
| <i>Etheostoma caeruleum</i>                                                                     | CytB        | 281+282      |
| <i>Pomoxis annularis</i>                                                                        | CytB        | 285+286      |
| <i>Crystallaria asprella</i>                                                                    | ND2         | 287+288      |
| <i>Crystallaria asprella</i>                                                                    | COI         | 289+290      |
| <b>TURTLES</b>                                                                                  |             |              |
| <i>Macrochelys temminckii</i>                                                                   | CytB        | 291+292      |
| <i>Macrochelys temminckii</i>                                                                   | COI         | 293+294      |
| <b>**SE Graptemys and Trachymys Turtles: nigrinoda, gibbonsi, concinna, and scripta elegans</b> | CytB        | 304+305      |
| <i>Graptemys nigrinoda and G. gibbonsi</i>                                                      | COI         | 295+296      |
| <i>Pseudemys concinna</i>                                                                       | CytB        | 299+300      |
| <i>Sternotherus odoratus and S. carinatus</i>                                                   | CytB        | 306+307      |
